# Supplementary material for: Bispyridinium-phenylene-based copolymers: low band gap n-type alternating copolymers
Source: Royal Society of Chemistry journal article supplement (doi:10.1039/c0jm02530e), 2011-01-01
Supplement: c0jm02530e.pdf [file c0jm02530e.pdf]

Supporting Information for

# Bispyridinium-Phenylene-Based Copolymers: Low Band Gap N-Type Alternating Copolymers

Daisuke Izuhara and Timothy M. Swager\*

Department of Chemistry, Massachusetts Institute of Technology,  
77 Massachusetts Avenue, Cambridge, Massachusetts 02139

[tswager@mit.edu](mailto:tswager@mit.edu)

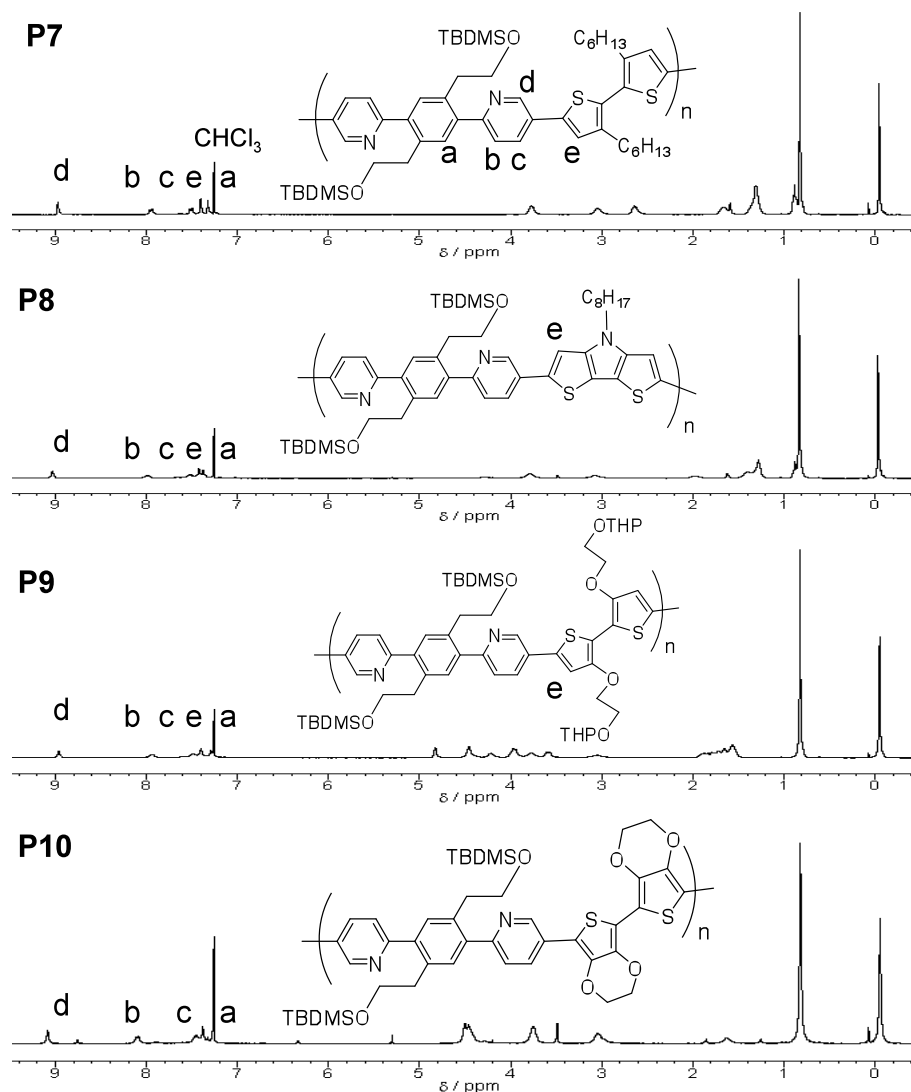

Figure S1.  $^1\text{H}$  NMR spectra of **P7-10** in  $\text{CDCl}_3$ .

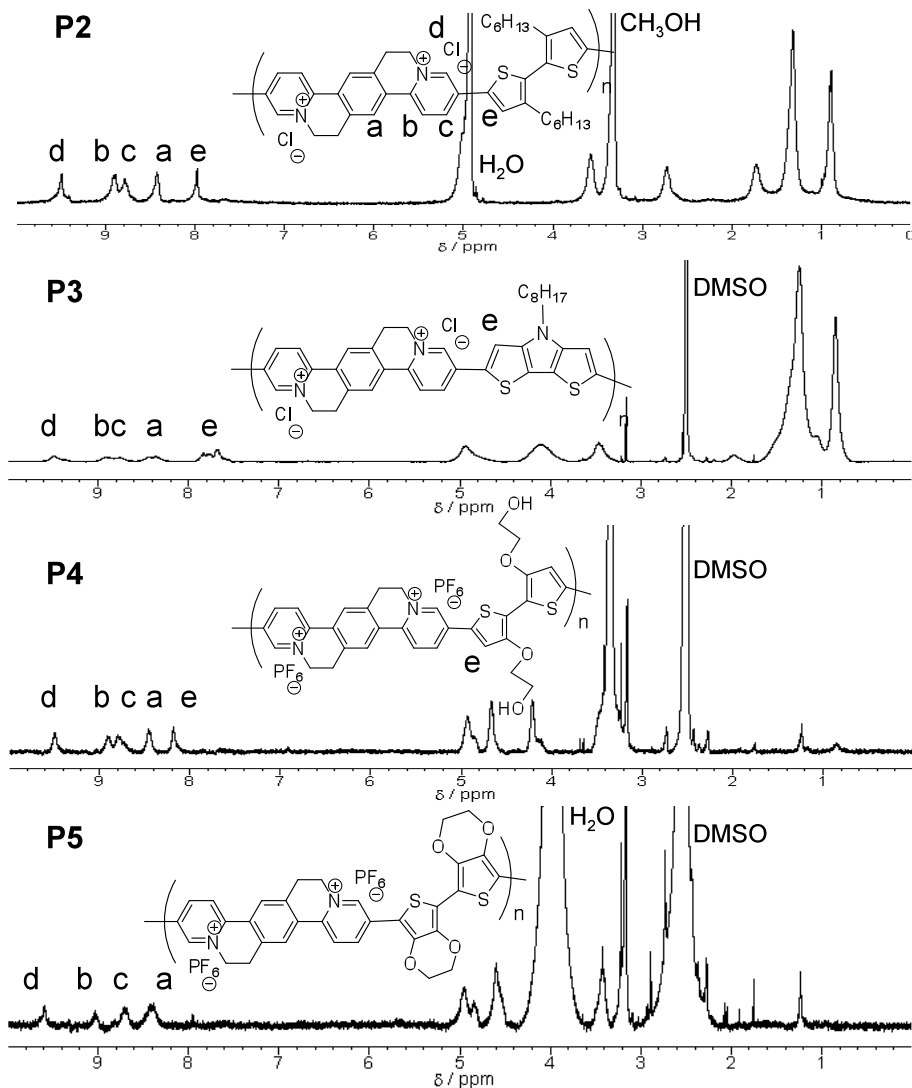

Figure S2.  $^1H$  NMR spectra of **P2-5** in  $CD_3OD$ ,  $DMSO-d_6$  or  $DMSO-d_6/D_2O$ .
